# Supplementary material
Source: Springer Nature journal article supplement (https://www.springermedizin.de/resource/supplementary/12936_2011_1918_MOESM7_ESM.pdf/9541982)
Supplement: MOESM7 [file 9541982]

## TEMPERATE ZONE TYPE

Infection

Primary  
attack \*

6-14 months latent period

Late primary  
or first  
relapse · relapse · relapse

*UNDERLYING TISSUE PHASE*

## TROPICAL ZONE TYPE

Infection

Primary  
attack · relapse · relapse · relapse · relapse · relapse · relapse

*UNDERLYING TISSUE PHASE*

\* Primary attack may be absent
